# Supplementary material
Source: PubMed Central journal article supplement (PMC7421598)

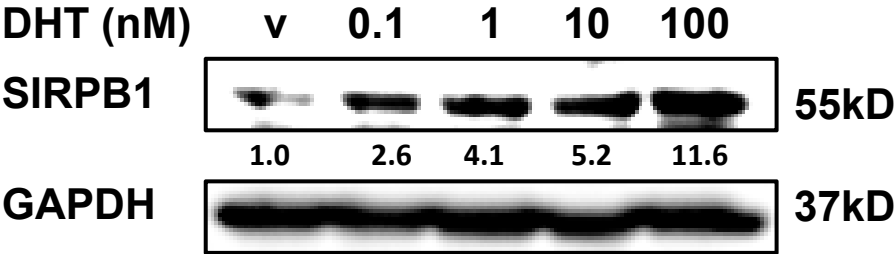

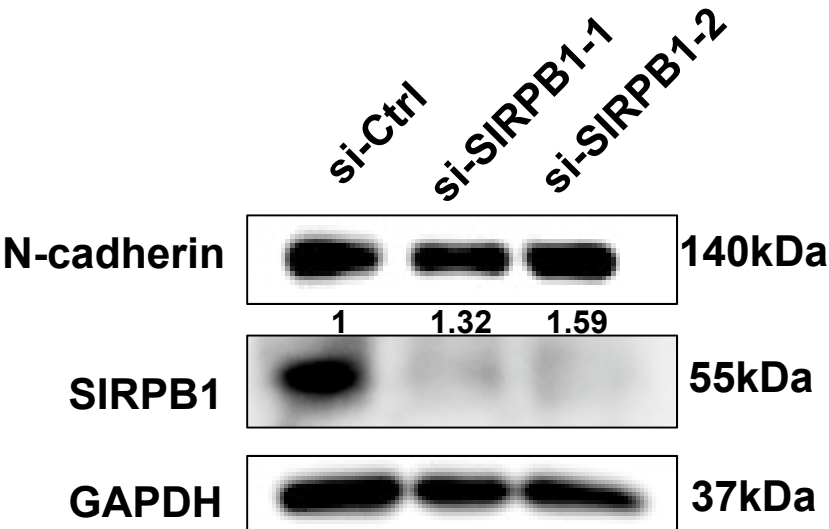

Supplement: NIHMS1611459-supplement-Supplemental_figures.pdf [file NIHMS1611459-supplement-Supplemental_figures.pdf]
